# Supplementary material
Source: MDPI journal article supplement (https://www.mdpi.com/2077-0472/11/10/914)
Supplement: s1 [file s1]

Archive with 6 entries (6 files):
- Sup Figures S1-S7.pdf
- Sup Info S1.xlsx
- Sup Info S2.pdf
- Sup Info S3.pdf
- Sup Info S4.xlsx
- Sup Tables S1-S4.pdf
