# Supplementary material
Source: MDPI journal article supplement (https://www.mdpi.com/2077-0472/11/10/914)
Supplement: s1 [file s1 › Sup Info S1.xlsx]

## Sheet: All 5 SNPs
Supporting Info S1. Allele frequencies in the five studied SNPs at the NCAPG-LCORL locus
Chicken breeds/populations/hybrids	Breed group	GGaluGA265969		GGaluGA265966		rs14491017		rs14491028		rs15619223
		Т	С	A	G	C	T	C	T	A	C
Egg-type breeds
Leghorn Light Brown	egg	0.92	0.08	0	1	0.92	0.08	0.975	0.02	0	1
Minorca Black	egg	0.23	0.77	0.08	0.92	0.65	0.35	0.785	0.21	0.575	0.42
Russian White (RRIFAGB, 2016)	egg	0.25	0.75	0.33	0.67	0.735	0.26	0.65	0.35	0.515	0.48
Russian White (RRIFAGB, 2001)	egg	0.33	0.67	0.33	0.67	1	0	0.665	0.33	0.335	0.66
Russian White (ARPRTI, 2001)	egg	0.5	0.5	0.27	0.73	1	0	0.82	0.18	0.18	0.82
Meat-type breeds
White Cornish (of commercial cross Smena-6, Line 1)	m	0.2	0.8	0.6	0.4	0.2	0.8	0.335	0.66	1	0
White Cornish (of commercial cross Smena-6, Line 2)	m	0.21	0.79	0.36	0.64	0.21	0.79	0.395	0.6	1	0
White Cornish × (Brahma Light × Sussex Light)	m	0.1	0.9	0.43	0.57	0.105	0.89	0.425	0.57	1	0
White Cornish × (Sussex Light × Amrock)	m	0.18	0.82	0.32	0.68	0.285	0.71	0.285	0.71	0.895	0.1
Egg-meat breeds
Zagorsk Salmon	dpb	0.24	0.76	0.61	0.39	0.275	0.72	0.275	0.72	0.97	0.03
Pushkin	dpb	0.1	0.9	1	0	0.3	0.7	0.3	0.7	1	0
Rhode Island Red	dpb	0.28	0.72	0.19	0.81	0.66	0.34	0.44	0.56	0.545	0.45
Leningrad Mille Fleur	dpb	0.36	0.64	0.57	0.43	0.31	0.69	0.26	0.74	0.855	0.14
New Hampshire	dpb	0.37	0.63	0.39	0.61	0.42	0.58	0.315	0.68	0.915	0.08
Leningrad Golden-and-gray	dpb	0.2	0.8	0.62	0.38	0.325	0.67	0.45	0.55	0.875	0.12
Pantsirevka Black	dpb	0.35	0.65	0.58	0.42	0.645	0.35	0.325	0.67	0.705	0.29
Meat-egg breeds
Australorp Black Speckled	dpb	0.22	0.78	0.45	0.55	0.475	0.52	0.7	0.3	0.775	0.22
Aurora Blue	dpb	0.3	0.7	0.32	0.68	0.475	0.52	0.575	0.42	0.825	0.17
Australorp Black	dpb	0.39	0.61	0.39	0.61	0.72	0.28	0.555	0.44	0.835	0.16
Amrock	dpb	0.27	0.73	0.25	0.75	0.475	0.52	0.4	0.6	0.875	0.12
Naked Neck	dpb	0.12	0.88	0.25	0.75	0.725	0.27	0.575	0.42	0.55	0.45
Pervomai	dpb	0.5	0.5	0.69	0.31	0.79	0.21	0.735	0.26	0.735	0.26
Plymouth Rock Barred	dpb	0.34	0.66	0.47	0.53	0.345	0.65	0.365	0.63	0.895	0.1
Poltava Clay	dpb	0.58	0.42	0.2	0.8	0.615	0.38	0.415	0.58	0.97	0.03
Sussex Light	dpb	0.38	0.62	0.5	0.5	0.62	0.38	0.58	0.42	0.8	0.2
Faverolles Salmon	dpb	0.2	0.8	0.45	0.55	0.725	0.27	0.55	0.45	0.475	0.52
Tsarskoye Selo	dpb	0.42	0.58	0.3	0.7	0.375	0.62	0.375	0.62	1	0
Yurlov Crower	dpb	0.17	0.83	0.32	0.68	0.65	0.35	0.6	0.4	0.95	0.05
Sussex Light × Amrock	dpb	0.32	0.68	0.54	0.46	0.39	0.61	0.575	0.42	0.965	0.035
Tsarskoye Selo × Sussex Light	dpb	0.32	0.68	0.42	0.58	0.395	0.6	0.575	0.42	0.93	0.07
Tsarskoye Selo × (Sussex Light × Amrock)	dpb	0.15	0.85	0.64	0.36	0.155	0.84	0.25	0.75	1	0
Brahma Light × Sussex Light	dpb	0.18	0.82	0.18	0.82	0.54	0.46	0.46	0.54	0.645	0.35
Red White-tailed Dwarf	dpb	0.36	0.64	0.47	0.53	0.365	0.63	0.11	0.89	0.915	0.08
Game breeds
Orloff Mille Fleur	b	0.6	0.4	0.47	0.53	0.625	0.37	0.425	0.57	0.8	0.2
Moscow Game	b	0.55	0.45	0.25	0.75	0.725	0.27	0.525	0.47	0.9	0.1
Uzbek Game	b	0.18	0.82	0.37	0.63	0.185	0.81	0.375	0.625	0.975	0.02
Uzbek Game × Amrock	b	0.25	0.75	0.53	0.47	0.285	0.71	0.18	0.82	0.965	0.035
Fancy breeds
Russian Crested	d	0.18	0.82	0.32	0.68	0.61	0.39	0.525	0.47	0.705	0.29
Ukrainian Muffed	d	0.33	0.67	0.47	0.53	0.555	0.46	0.53	0.47	0.775	0.22
Bantam Mille Fleur	d	0	1	0.3	0.7	0.975	0.02	0.425	0.57	0.6	0.4
Brahma Buff	d	0.1	0.9	0.77	0.23	0.275	0.72	0.15	0.85	0.825	0.17
Brahma Light	d	0.15	0.85	0.27	0.73	0.625	0.37	0.3	0.7	0.525	0.47
Hamburg Silver Spangled Dwarf	d	0.87	0.13	0.37	0.63	1	0	0	1	0.075	0.92
Poland White-crested Black	d	0.05	0.95	0.18	0.82	0.86	0.14	0.83	0.17	0.36	0.64
Silkie White	d	0	1	0.29	0.71	0.37	0.63	0.315	0.68	1	0
Cochin Bantam	d	0.12	0.88	0.8	0.2	0.05	0.95	0.8	0.2	0.95	0.05
Frizzle	d	0.37	0.63	0.62	0.38	0.525	0.47	0.525	0.47	0.875	0.12
Pavlov Spangled	d	0	1	0.02	0.98	0.975	0.02	0.4	0.6	0.6	0.4
Pavlov White	d	0	1	0.13	0.87	0.9	0.1	0.665	0.33	0.435	0.56
The breeds are grouped according to TCM.

## Sheet: GGaluGA265969
Breed group	GGaluGA265969
egg	0.92
egg	0.23
egg	0.25
egg	0.33
egg	0.5
m	0.2
m	0.21
m	0.1
m	0.18
dpb	0.24
dpb	0.1
dpb	0.28
dpb	0.36
dpb	0.37
dpb	0.2
dpb	0.35
dpb	0.22
dpb	0.3
dpb	0.39
dpb	0.27
dpb	0.12
dpb	0.5
dpb	0.34
dpb	0.58
dpb	0.38
dpb	0.2
dpb	0.42
dpb	0.17
dpb	0.32
dpb	0.32
dpb	0.15
dpb	0.18
dpb	0.36
b	0.6
b	0.55
b	0.18
b	0.25
d	0.18
d	0.33
d	0
d	0.1
d	0.15
d	0.87
d	0.05
d	0
d	0.12
d	0.37
d	0
d	0

## Sheet: GGaluGA265966
Breed group	GGaluGA265966
egg	0
egg	0.08
egg	0.33
egg	0.33
egg	0.27
m	0.6
m	0.36
m	0.43
m	0.32
dpb	0.61
dpb	1
dpb	0.19
dpb	0.57
dpb	0.39
dpb	0.62
dpb	0.58
dpb	0.45
dpb	0.32
dpb	0.39
dpb	0.25
dpb	0.25
dpb	0.69
dpb	0.47
dpb	0.2
dpb	0.5
dpb	0.45
dpb	0.3
dpb	0.32
dpb	0.54
dpb	0.42
dpb	0.64
dpb	0.18
dpb	0.47
b	0.47
b	0.25
b	0.37
b	0.53
d	0.32
d	0.47
d	0.3
d	0.77
d	0.27
d	0.37
d	0.18
d	0.29
d	0.8
d	0.62
d	0.02
d	0.13

## Sheet: rs14491017
Breed group	rs14491017
egg	0.92
egg	0.65
egg	0.735
egg	1
egg	1
m	0.2
m	0.21
m	0.105
m	0.285
dpb	0.275
dpb	0.3
dpb	0.66
dpb	0.31
dpb	0.42
dpb	0.325
dpb	0.645
dpb	0.475
dpb	0.475
dpb	0.72
dpb	0.475
dpb	0.725
dpb	0.79
dpb	0.345
dpb	0.615
dpb	0.62
dpb	0.725
dpb	0.375
dpb	0.65
dpb	0.39
dpb	0.395
dpb	0.155
dpb	0.54
dpb	0.365
b	0.625
b	0.725
b	0.185
b	0.285
d	0.61
d	0.555
d	0.975
d	0.275
d	0.625
d	1
d	0.86
d	0.37
d	0.05
d	0.525
d	0.975
d	0.9

## Sheet: rs14491028
Breed group	rs14491028
egg	0.975
egg	0.785
egg	0.65
egg	0.665
egg	0.82
m	0.335
m	0.395
m	0.425
m	0.285
dpb	0.275
dpb	0.3
dpb	0.44
dpb	0.26
dpb	0.315
dpb	0.45
dpb	0.325
dpb	0.7
dpb	0.575
dpb	0.555
dpb	0.4
dpb	0.575
dpb	0.735
dpb	0.365
dpb	0.415
dpb	0.58
dpb	0.55
dpb	0.375
dpb	0.6
dpb	0.575
dpb	0.575
dpb	0.25
dpb	0.46
dpb	0.11
b	0.425
b	0.525
b	0.375
b	0.18
d	0.525
d	0.53
d	0.425
d	0.15
d	0.3
d	0
d	0.83
d	0.315
d	0.8
d	0.525
d	0.4
d	0.665

## Sheet: rs15619223
Breed group	rs15619223
egg	0
egg	0.575
egg	0.515
egg	0.335
egg	0.18
m	1
m	1
m	1
m	0.895
dpb	0.97
dpb	1
dpb	0.545
dpb	0.855
dpb	0.915
dpb	0.875
dpb	0.705
dpb	0.775
dpb	0.825
dpb	0.835
dpb	0.875
dpb	0.55
dpb	0.735
dpb	0.895
dpb	0.97
dpb	0.8
dpb	0.475
dpb	1
dpb	0.95
dpb	0.965
dpb	0.93
dpb	1
dpb	0.645
dpb	0.915
b	0.8
b	0.9
b	0.975
b	0.965
d	0.705
d	0.775
d	0.6
d	0.825
d	0.525
d	0.075
d	0.36
d	1
d	0.95
d	0.875
d	0.6
d	0.435
