# Supplementary material
Source: MDPI journal article supplement (https://www.mdpi.com/2077-0472/11/10/914)
Supplement: s1 [file s1 › Sup Info S4.xlsx]

## Sheet: GGA4_Full
Supporting Info S4. Known QTLs at the NCAPG-LCORL locus and relevant SNPs in the Chicken QTLdb database
Chr.	Association/QTL	Start	End	QTL_ID	Name	Abbrev	PUBMED_ID	trait_ID	trait	Coord_src	FlankMarker	breed	PTO_name	VTO_name	CMO_name	Map_Typ	Model	Test_Base	Significance	LOD-score	P-value	Variance	gene_ID	gene_IDsrc	gene_name
Chr.4	Production_Association	75845678	75845682	63852	Egg weight	EW	26438435	2003	Egg weight	SNP	rs312893965		egg weight		egg weight, fowl	Genome	Mendelian	Genome-wise	Significant		<0.05
Chr.4	Production_Association	75846043	75846047	63854	Egg weight	EW	26438435	2003	Egg weight	SNP	rs314487178		egg weight		egg weight, fowl	Genome	Mendelian	Genome-wise	Significant		<0.05
Chr.4	Production_Association	75846043	75846047	193679	Tibia weight	TIBWT	31794256	2196	Tibia weight	SNP	rs314487178	leghorn		tibia mass	tibia weight	Genome	-	-	Significant			0.033	422820	NCBIgene	LCORL
Chr.4	Production_Association	75846043	75846047	193678	Tibia length	TL	31794256	2032	Tibia length	SNP	rs314487178	leghorn		tibia length	tibia length	Genome	-	-	Significant			0.026	422820	NCBIgene	LCORL
Chr.4	Production_Association	75846043	75846047	63853	Egg weight	EW	26438435	2003	Egg weight	SNP	rs314487178		egg weight		egg weight, fowl	Genome	Mendelian	Genome-wise	Significant		<0.05
Chr.4	Production_Association	75848459	75848463	160802	Average daily gain	ADG	30058133	2174	Average daily gain	SNP	rs315625415	leghorn		postnatal growth trait	average daily body weight gain	Genome	Mendelian	Genome-wise	Significant	5.71	<0.05	0.13	422820	NCBIgene	LCORL
Chr.4	Production_Association	75850292	75850296	16755	Egg weight	EW	22174844	2003	Egg weight	SNP	rs15619223		egg weight		egg weight, fowl	Genome	Mendelian	Chromosome-wise	Significant		<0.05
Chr.4	Production_Association	75852356	75852360	63855	Egg weight	EW	26438435	2003	Egg weight	SNP	rs314745738		egg weight		egg weight, fowl	Genome	Mendelian	Genome-wise	Significant		<0.05
Chr.4	Production_Association	75857632	75857636	19517	Egg weight	EW	22742506	2003	Egg weight	SNP	rs14699480		egg weight		egg weight, fowl	Genome	Mendelian		Significant		2.2e-10	4.6
Chr.4	Production_Association	75857632	75857636	19523	Egg weight	EW	22742506	2003	Egg weight	SNP	rs14699480		egg weight		egg weight, fowl	Genome	Mendelian		Significant		6.9e-08	1.1
Chr.4	Production_Association	75869579	75869583	160803	Average daily gain	ADG	30058133	2174	Average daily gain	SNP	rs314961352	leghorn		postnatal growth trait	average daily body weight gain	Genome	Mendelian	Genome-wise	Significant	5.71	<0.05	0.13	422820	NCBIgene	LCORL
Chr.4	Production_Association	75885775	75885779	16756	Egg weight	EW	22174844	2003	Egg weight	SNP	rs14491017		egg weight		egg weight, fowl	Genome	Mendelian	Chromosome-wise	Significant		<0.05
Chr.4	Production_Association	75887990	75887994	63856	Egg weight	EW	26438435	2003	Egg weight	SNP	rs316289892		egg weight		egg weight, fowl	Genome	Mendelian	Genome-wise	Significant		<0.05
Chr.4	Reproduction_Association	75887990	75887994	151104	Oviduct weight	OVIDW	29281706	2432	Oviduct weight	SNP	rs316289892			oviduct mass		Genome	Mendelian	Genome-wise	Suggestive		<1
Chr.4	Reproduction_Association	75895964	75895968	151032	Oviduct length	OVIDL	29281706	2431	Oviduct length	SNP	rs15619270			oviduct length		Genome	Mendelian	Genome-wise	Suggestive		<1
Chr.4	Production_Association	75895964	75895968	63857	Egg weight	EW	26438435	2003	Egg weight	SNP	rs15619270		egg weight		egg weight, fowl	Genome	Mendelian	Genome-wise	Significant		<0.05
Chr.4	Production_Association	75895964	75895968	63860	Egg weight	EW	26438435	2003	Egg weight	SNP	rs15619270		egg weight		egg weight, fowl	Genome	Mendelian	Genome-wise	Significant		<0.05
Chr.4	Production_Association	75895964	75895968	170511	Liver weight	LIVWT	30056651	2053	Liver weight	SNP	rs15619270	leghorn		liver mass	liver weight	Genome	Mendelian	Genome-wise	Significant		<0.05	0.0198
Chr.4	Production_Association	75895964	75895968	63863	Egg weight	EW	26438435	2003	Egg weight	SNP	rs15619270		egg weight		egg weight, fowl	Genome	Mendelian	Genome-wise	Significant		<0.05
Chr.4	Reproduction_Association	75895964	75895968	151105	Oviduct weight	OVIDW	29281706	2432	Oviduct weight	SNP	rs15619270			oviduct mass		Genome	Mendelian	Genome-wise	Suggestive		<1
Chr.4	Production_Association	75895964	75895968	63858	Egg weight	EW	26438435	2003	Egg weight	SNP	rs15619270		egg weight		egg weight, fowl	Genome	Mendelian	Genome-wise	Significant		<0.05
Chr.4	Production_Association	75895964	75895968	63861	Egg weight	EW	26438435	2003	Egg weight	SNP	rs15619270		egg weight		egg weight, fowl	Genome	Mendelian	Genome-wise	Significant		<0.05
Chr.4	Production_Association	75895964	75895968	170512	Proventriculus weight	PRVWT	30056651	2207	Proventriculus weight	SNP	rs15619270	leghorn		proventriculus mass		Genome	Mendelian	Genome-wise	Significant		<0.05	0.0237
Chr.4	Production_Association	75895964	75895968	63864	Egg weight	EW	26438435	2003	Egg weight	SNP	rs15619270		egg weight		egg weight, fowl	Genome	Mendelian	Genome-wise	Significant		<0.05
Chr.4	Exterior_Association	75895964	75895968	194005	Feather density	FDENS	31656738	2501	Feather density	SNP	rs15619270	leghorn				Genome	Mendelian	Comparison-wise	Significant		1.04e-05
Chr.4	Production_Association	75895964	75895968	63859	Egg weight	EW	26438435	2003	Egg weight	SNP	rs15619270		egg weight		egg weight, fowl	Genome	Mendelian	Genome-wise	Significant		<0.05
Chr.4	Production_Association	75895964	75895968	170510	Heart weight	HWT	30056651	2051	Heart weight	SNP	rs15619270	leghorn		heart mass	heart weight	Genome	Mendelian	Genome-wise	Significant		<0.05	0.035
Chr.4	Production_Association	75895964	75895968	63862	Egg weight	EW	26438435	2003	Egg weight	SNP	rs15619270		egg weight		egg weight, fowl	Genome	Mendelian	Genome-wise	Significant		<0.05
Chr.4	Production_Association	75895964	75895968	170513	Gizzard weight	GIZZWT	30056651	2050	Gizzard weight	SNP	rs15619270	leghorn		gizzard mass		Genome	Mendelian	Genome-wise	Significant		<0.05	0.0329
Chr.4	Production_Association	75903271	75903275	170514	Heart weight	HWT	30056651	2051	Heart weight	SNP	rs315201454	leghorn		heart mass	heart weight	Genome	Mendelian	Genome-wise	Significant		<0.05	0.0368	422822	NCBIgene	NCAPG
Chr.4	Production_Association	75903271	75903275	63866	Egg weight	EW	26438435	2003	Egg weight	SNP	rs315201454		egg weight		egg weight, fowl	Genome	Mendelian	Genome-wise	Significant		<0.05
Chr.4	Production_Association	75903271	75903275	170517	Gizzard weight	GIZZWT	30056651	2050	Gizzard weight	SNP	rs315201454	leghorn		gizzard mass		Genome	Mendelian	Genome-wise	Significant		<0.05	0.0337	422822	NCBIgene	NCAPG
Chr.4	Production_Association	75903271	75903275	63930	Egg weight	EW	26438435	2003	Egg weight	SNP	rs315201454		egg weight		egg weight, fowl	Genome	Mendelian	Genome-wise	Significant		<0.05
Chr.4	Production_Association	75903271	75903275	63869	Egg weight	EW	26438435	2003	Egg weight	SNP	rs315201454		egg weight		egg weight, fowl	Genome	Mendelian	Genome-wise	Significant		<0.05
Chr.4	Production_Association	75903271	75903275	63872	Egg weight	EW	26438435	2003	Egg weight	SNP	rs315201454		egg weight		egg weight, fowl	Genome	Mendelian	Genome-wise	Significant		<0.05
Chr.4	Reproduction_Association	75903271	75903275	151033	Oviduct length	OVIDL	29281706	2431	Oviduct length	SNP	rs315201454			oviduct length		Genome	Mendelian	Genome-wise	Suggestive		<1
Chr.4	Production_Association	75903271	75903275	170515	Liver weight	LIVWT	30056651	2053	Liver weight	SNP	rs315201454	leghorn		liver mass	liver weight	Genome	Mendelian	Genome-wise	Significant		<0.05	0.0219	422822	NCBIgene	NCAPG
Chr.4	Reproduction_Association	75903271	75903275	151106	Oviduct weight	OVIDW	29281706	2432	Oviduct weight	SNP	rs315201454			oviduct mass		Genome	Mendelian	Genome-wise	Suggestive		<1
Chr.4	Production_Association	75903271	75903275	63867	Egg weight	EW	26438435	2003	Egg weight	SNP	rs315201454		egg weight		egg weight, fowl	Genome	Mendelian	Genome-wise	Significant		<0.05
Chr.4	Production_Association	75903271	75903275	63870	Egg weight	EW	26438435	2003	Egg weight	SNP	rs315201454		egg weight		egg weight, fowl	Genome	Mendelian	Genome-wise	Significant		<0.05
Chr.4	Production_Association	75903271	75903275	63865	Egg weight	EW	26438435	2003	Egg weight	SNP	rs315201454		egg weight		egg weight, fowl	Genome	Mendelian	Genome-wise	Significant		<0.05
Chr.4	Production_Association	75903271	75903275	170516	Proventriculus weight	PRVWT	30056651	2207	Proventriculus weight	SNP	rs315201454	leghorn		proventriculus mass		Genome	Mendelian	Genome-wise	Significant		<0.05	0.0242	422822	NCBIgene	NCAPG
Chr.4	Production_Association	75903271	75903275	63868	Egg weight	EW	26438435	2003	Egg weight	SNP	rs315201454		egg weight		egg weight, fowl	Genome	Mendelian	Genome-wise	Significant		<0.05
Chr.4	Production_Association	75903271	75903275	63871	Egg weight	EW	26438435	2003	Egg weight	SNP	rs315201454		egg weight		egg weight, fowl	Genome	Mendelian	Genome-wise	Significant		<0.05
Chr.4	Production_Association	75904186	75904190	63880	Egg weight	EW	26438435	2003	Egg weight	SNP	rs14491030		egg weight		egg weight, fowl	Genome	Mendelian	Genome-wise	Significant		<0.05
Chr.4	Production_QTL	75904186	75904190	24941	Yolk weight	YW	24628796	2126	Yolk weight	SNP	rs14490890,rs14491030,rs14491074		egg yolk weight		egg yolk weight, fowl	Genome	Mendelian	-	Suggestive		0.067	3.93
Chr.4	Production_Association	75904186	75904190	193682	Femur length	FEML	31794256	2161	Femur length	SNP	rs14491030	leghorn		femur length	femur length	Genome	-	-	Significant			0.021	422822	NCBIgene	NCAPG
Chr.4	Production_QTL	75904186	75904190	24944	Egg production rate	EPR	24628796	2002	Egg production rate	SNP	rs14490890,rs14491030,rs14491074			egg production trait	egg production rate, fowl	Genome	Mendelian	-	Significant		0.042	2.44
Chr.4	Production_Association	75904186	75904190	170520	Liver weight	LIVWT	30056651	2053	Liver weight	SNP	rs14491030	leghorn		liver mass	liver weight	Genome	Mendelian	Genome-wise	Significant		<0.05	0.0189
Chr.4	Production_Association	75904186	75904190	63875	Egg weight	EW	26438435	2003	Egg weight	SNP	rs14491030		egg weight		egg weight, fowl	Genome	Mendelian	Genome-wise	Significant		<0.05
Chr.4	Production_Association	75904186	75904190	63878	Egg weight	EW	26438435	2003	Egg weight	SNP	rs14491030		egg weight		egg weight, fowl	Genome	Mendelian	Genome-wise	Significant		<0.05
Chr.4	Production_Association	75904186	75904190	19516	Egg weight	EW	22742506	2003	Egg weight	SNP	rs14491030		egg weight		egg weight, fowl	Genome	Mendelian		Significant		1.4e-15
Chr.4	Production_Association	75904186	75904190	19522	Egg weight	EW	22742506	2003	Egg weight	SNP	rs14491030		egg weight		egg weight, fowl	Genome	Mendelian		Significant		2.02e-09	22.7
Chr.4	Production_Association	75904186	75904190	193680	Femur area	FEMA	31794256	2500	Femur area	SNP	rs14491030	leghorn		femur area	femur area	Genome	-	-	Significant			0.051	422822	NCBIgene	NCAPG
Chr.4	Production_Association	75904186	75904190	193683	Shank length	SHKLN	31794256	2182	Shank length	SNP	rs14491030	leghorn		tarsometatarsus length		Genome	-	-	Significant			0.029	422822	NCBIgene	NCAPG
Chr.4	Production_Association	75904186	75904190	170518	Heart weight	HWT	30056651	2051	Heart weight	SNP	rs14491030	leghorn		heart mass	heart weight	Genome	Mendelian	Genome-wise	Significant		<0.05	0.0328	422822	NCBIgene	NCAPG
Chr.4	Production_Association	75904186	75904190	170521	Gizzard weight	GIZZWT	30056651	2050	Gizzard weight	SNP	rs14491030	leghorn		gizzard mass		Genome	Mendelian	Genome-wise	Significant		<0.05	0.0328	422822	NCBIgene	NCAPG
Chr.4	Production_Association	75904186	75904190	63873	Egg weight	EW	26438435	2003	Egg weight	SNP	rs14491030		egg weight		egg weight, fowl	Genome	Mendelian	Genome-wise	Significant		<0.05
Chr.4	Production_Association	75904186	75904190	63876	Egg weight	EW	26438435	2003	Egg weight	SNP	rs14491030		egg weight		egg weight, fowl	Genome	Mendelian	Genome-wise	Significant		<0.05
Chr.4	Production_Association	75904186	75904190	19514	Egg weight	EW	22742506	2003	Egg weight	SNP	rs14491030		egg weight		egg weight, fowl	Genome	Mendelian		Significant		0.005	21.3
Chr.4	Production_Association	75904186	75904190	63879	Egg weight	EW	26438435	2003	Egg weight	SNP	rs14491030		egg weight		egg weight, fowl	Genome	Mendelian	Genome-wise	Significant		<0.05
Chr.4	Production_QTL	75904186	75904190	24937	Yolk weight	YW	24628796	2126	Yolk weight	SNP	rs14490890,rs14491030,rs14491074		egg yolk weight		egg yolk weight, fowl	Genome	Mendelian	-	Significant		0.002	6.01
Chr.4	Production_Association	75904186	75904190	193681	Tibia length	TL	31794256	2032	Tibia length	SNP	rs14491030	leghorn		tibia length	tibia length	Genome	-	-	Significant			0.042	422822	NCBIgene	NCAPG
Chr.4	Production_Association	75904186	75904190	193684	Tibia weight	TIBWT	31794256	2196	Tibia weight	SNP	rs14491030	leghorn		tibia mass	tibia weight	Genome	-	-	Significant			0.034	422822	NCBIgene	NCAPG
Chr.4	Reproduction_Association	75904186	75904190	151034	Oviduct length	OVIDL	29281706	2431	Oviduct length	SNP	rs14491030			oviduct length		Genome	Mendelian	Genome-wise	Suggestive		<1
Chr.4	Production_QTL	75904186	75904190	24949	Body weight	BW	24628796	2042	Body weight	SNP	rs14490890,rs14491030,rs14491074			body mass	body weight	Genome	Mendelian	-	Significant		<0.0001	31.98
Chr.4	Production_Association	75904186	75904190	63926	Egg weight	EW	26438435	2003	Egg weight	SNP	rs14491030		egg weight		egg weight, fowl	Genome	Mendelian	Genome-wise	Significant		<0.05
Chr.4	Reproduction_Association	75904186	75904190	151107	Oviduct weight	OVIDW	29281706	2432	Oviduct weight	SNP	rs14491030			oviduct mass		Genome	Mendelian	Genome-wise	Suggestive		<1
Chr.4	Production_Association	75904186	75904190	170519	Proventriculus weight	PRVWT	30056651	2207	Proventriculus weight	SNP	rs14491030	leghorn		proventriculus mass		Genome	Mendelian	Genome-wise	Significant		<0.05	0.0218	422822	NCBIgene	NCAPG
Chr.4	Production_QTL	75904186	75904190	24916	Albumen height	AH	24628796	2008	Albumen height	SNP	rs14490890,rs14491030,rs14491074		egg albumen height		egg albumen height, fowl	Genome	Mendelian	-	Significant		0.002	6.59	HGNC
Chr.4	Production_QTL	75904186	75904190	24919	Albumen height	AH	24628796	2008	Albumen height	SNP	rs14490890,rs14491030,rs14491074		egg albumen height		egg albumen height, fowl	Genome	Mendelian	-	Significant		0.002	6.55
Chr.4	Production_Association	75904186	75904190	63874	Egg weight	EW	26438435	2003	Egg weight	SNP	rs14491030		egg weight		egg weight, fowl	Genome	Mendelian	Genome-wise	Significant		<0.05
Chr.4	Production_Association	75904186	75904190	19512	Egg weight	EW	22742506	2003	Egg weight	SNP	rs14491030		egg weight		egg weight, fowl	Genome	Mendelian		Significant		9.9e-14	38.5
Chr.4	Production_Association	75904186	75904190	63877	Egg weight	EW	26438435	2003	Egg weight	SNP	rs14491030		egg weight		egg weight, fowl	Genome	Mendelian	Genome-wise	Significant		<0.05
Chr.4	Production_Association	75913100	75913104	63883	Egg weight	EW	26438435	2003	Egg weight	SNP	rs316243629		egg weight		egg weight, fowl	Genome	Mendelian	Genome-wise	Significant		<0.05
Chr.4	Production_Association	75913100	75913104	63886	Egg weight	EW	26438435	2003	Egg weight	SNP	rs316243629		egg weight		egg weight, fowl	Genome	Mendelian	Genome-wise	Significant		<0.05
Chr.4	Reproduction_Association	75913100	75913104	151035	Oviduct length	OVIDL	29281706	2431	Oviduct length	SNP	rs316243629			oviduct length		Genome	Mendelian	Genome-wise	Suggestive		<1
Chr.4	Reproduction_Association	75913100	75913104	151108	Oviduct weight	OVIDW	29281706	2432	Oviduct weight	SNP	rs316243629			oviduct mass		Genome	Mendelian	Genome-wise	Suggestive		<1
Chr.4	Production_Association	75913100	75913104	170523	Liver weight	LIVWT	30056651	2053	Liver weight	SNP	rs316243629	leghorn		liver mass	liver weight	Genome	Mendelian	Genome-wise	Significant		<0.05	0.0219	422822	NCBIgene	NCAPG
Chr.4	Production_Association	75913100	75913104	63881	Egg weight	EW	26438435	2003	Egg weight	SNP	rs316243629		egg weight		egg weight, fowl	Genome	Mendelian	Genome-wise	Significant		<0.05
Chr.4	Production_Association	75913100	75913104	63884	Egg weight	EW	26438435	2003	Egg weight	SNP	rs316243629		egg weight		egg weight, fowl	Genome	Mendelian	Genome-wise	Significant		<0.05
Chr.4	Production_Association	75913100	75913104	63887	Egg weight	EW	26438435	2003	Egg weight	SNP	rs316243629		egg weight		egg weight, fowl	Genome	Mendelian	Genome-wise	Significant		<0.05
Chr.4	Production_Association	75913100	75913104	63931	Egg weight	EW	26438435	2003	Egg weight	SNP	rs316243629		egg weight		egg weight, fowl	Genome	Mendelian	Genome-wise	Significant		<0.05
Chr.4	Production_Association	75913100	75913104	170524	Proventriculus weight	PRVWT	30056651	2207	Proventriculus weight	SNP	rs316243629	leghorn		proventriculus mass		Genome	Mendelian	Genome-wise	Significant		<0.05	0.0242	422822	NCBIgene	NCAPG
Chr.4	Production_Association	75913100	75913104	63882	Egg weight	EW	26438435	2003	Egg weight	SNP	rs316243629		egg weight		egg weight, fowl	Genome	Mendelian	Genome-wise	Significant		<0.05
Chr.4	Production_Association	75913100	75913104	63885	Egg weight	EW	26438435	2003	Egg weight	SNP	rs316243629		egg weight		egg weight, fowl	Genome	Mendelian	Genome-wise	Significant		<0.05
Chr.4	Production_Association	75913100	75913104	63888	Egg weight	EW	26438435	2003	Egg weight	SNP	rs316243629		egg weight		egg weight, fowl	Genome	Mendelian	Genome-wise	Significant		<0.05
Chr.4	Production_Association	75913100	75913104	170522	Heart weight	HWT	30056651	2051	Heart weight	SNP	rs316243629	leghorn		heart mass	heart weight	Genome	Mendelian	Genome-wise	Significant		<0.05	0.0368	422822	NCBIgene	NCAPG
Chr.4	Production_Association	75913100	75913104	170525	Gizzard weight	GIZZWT	30056651	2050	Gizzard weight	SNP	rs316243629	leghorn		gizzard mass		Genome	Mendelian	Genome-wise	Significant		<0.05	0.0337	422822	NCBIgene	NCAPG
Notes:
The data was retrieved from the Chicken QTLdb [46], with the coordinates being provided for the GRCg6a chicken genome build [49].
Two significant SNPs, rs15619223 and rs14491017, identified in this study are orange highlighted.
Light orange highlight shows an interval for the significant SNP rs14491028 also found in the present investigation.

## Sheet: Short
Chr.4	75845678	75845682	Egg weight QTL (63852)		+	75845678	75845682	.	.	.	.
Chr.4	75846043	75846047	Egg weight QTL (63854)		+	75846043	75846047	.	.	.	.
Chr.4	75846043	75846047	Tibia weight QTL (193679)		+	75846043	75846047	.	.	.	.
Chr.4	75846043	75846047	Tibia length QTL (193678)		+	75846043	75846047	.	.	.	.
Chr.4	75846043	75846047	Egg weight QTL (63853)		+	75846043	75846047	.	.	.	.
Chr.4	75848459	75848463	Average daily gain QTL (160802)		+	75848459	75848463	.	.	.	.
Chr.4	75850292	75850296	Egg weight QTL (16755)		+	75850292	75850296	.	.	.	.
Chr.4	75852356	75852360	Egg weight QTL (63855)		+	75852356	75852360	.	.	.	.
Chr.4	75857632	75857636	Egg weight QTL (19517)		+	75857632	75857636	.	.	.	.
Chr.4	75857632	75857636	Egg weight QTL (19523)		+	75857632	75857636	.	.	.	.
Chr.4	75869579	75869583	Average daily gain QTL (160803)		+	75869579	75869583	.	.	.	.
Chr.4	75885775	75885779	Egg weight QTL (16756)		+	75885775	75885779	.	.	.	.
Chr.4	75887990	75887994	Egg weight QTL (63856)		+	75887990	75887994	.	.	.	.
Chr.4	75887990	75887994	Oviduct weight QTL (151104)		+	75887990	75887994	.	.	.	.
Chr.4	75895964	75895968	Oviduct length QTL (151032)		+	75895964	75895968	.	.	.	.
Chr.4	75895964	75895968	Egg weight QTL (63857)		+	75895964	75895968	.	.	.	.
Chr.4	75895964	75895968	Egg weight QTL (63860)		+	75895964	75895968	.	.	.	.
Chr.4	75895964	75895968	Liver weight QTL (170511)		+	75895964	75895968	.	.	.	.
Chr.4	75895964	75895968	Egg weight QTL (63863)		+	75895964	75895968	.	.	.	.
Chr.4	75895964	75895968	Oviduct weight QTL (151105)		+	75895964	75895968	.	.	.	.
Chr.4	75895964	75895968	Egg weight QTL (63858)		+	75895964	75895968	.	.	.	.
Chr.4	75895964	75895968	Egg weight QTL (63861)		+	75895964	75895968	.	.	.	.
Chr.4	75895964	75895968	Proventriculus weight QTL (170512)		+	75895964	75895968	.	.	.	.
Chr.4	75895964	75895968	Egg weight QTL (63864)		+	75895964	75895968	.	.	.	.
Chr.4	75895964	75895968	Feather density QTL (194005)		+	75895964	75895968	.	.	.	.
Chr.4	75895964	75895968	Egg weight QTL (63859)		+	75895964	75895968	.	.	.	.
Chr.4	75895964	75895968	Heart weight QTL (170510)		+	75895964	75895968	.	.	.	.
Chr.4	75895964	75895968	Egg weight QTL (63862)		+	75895964	75895968	.	.	.	.
Chr.4	75895964	75895968	Gizzard weight QTL (170513)		+	75895964	75895968	.	.	.	.
Chr.4	75903271	75903275	Heart weight QTL (170514)		+	75903271	75903275	.	.	.	.
Chr.4	75903271	75903275	Egg weight QTL (63866)		+	75903271	75903275	.	.	.	.
Chr.4	75903271	75903275	Gizzard weight QTL (170517)		+	75903271	75903275	.	.	.	.
Chr.4	75903271	75903275	Egg weight QTL (63930)		+	75903271	75903275	.	.	.	.
Chr.4	75903271	75903275	Egg weight QTL (63869)		+	75903271	75903275	.	.	.	.
Chr.4	75903271	75903275	Egg weight QTL (63872)		+	75903271	75903275	.	.	.	.
Chr.4	75903271	75903275	Oviduct length QTL (151033)		+	75903271	75903275	.	.	.	.
Chr.4	75903271	75903275	Liver weight QTL (170515)		+	75903271	75903275	.	.	.	.
Chr.4	75903271	75903275	Oviduct weight QTL (151106)		+	75903271	75903275	.	.	.	.
Chr.4	75903271	75903275	Egg weight QTL (63867)		+	75903271	75903275	.	.	.	.
Chr.4	75903271	75903275	Egg weight QTL (63870)		+	75903271	75903275	.	.	.	.
Chr.4	75903271	75903275	Egg weight QTL (63865)		+	75903271	75903275	.	.	.	.
Chr.4	75903271	75903275	Proventriculus weight QTL (170516)		+	75903271	75903275	.	.	.	.
Chr.4	75903271	75903275	Egg weight QTL (63868)		+	75903271	75903275	.	.	.	.
Chr.4	75903271	75903275	Egg weight QTL (63871)		+	75903271	75903275	.	.	.	.
Chr.4	75904186	75904190	Egg weight QTL (63880)		+	75904186	75904190	.	.	.	.
Chr.4	75904186	75904190	Yolk weight QTL (24941)		+	75904186	75904190	.	.	.	.
Chr.4	75904186	75904190	Femur length QTL (193682)		+	75904186	75904190	.	.	.	.
Chr.4	75904186	75904190	Egg production rate QTL (24944)		+	75904186	75904190	.	.	.	.
Chr.4	75904186	75904190	Liver weight QTL (170520)		+	75904186	75904190	.	.	.	.
Chr.4	75904186	75904190	Egg weight QTL (63875)		+	75904186	75904190	.	.	.	.
Chr.4	75904186	75904190	Egg weight QTL (63878)		+	75904186	75904190	.	.	.	.
Chr.4	75904186	75904190	Egg weight QTL (19516)		+	75904186	75904190	.	.	.	.
Chr.4	75904186	75904190	Egg weight QTL (19522)		+	75904186	75904190	.	.	.	.
Chr.4	75904186	75904190	Femur area QTL (193680)		+	75904186	75904190	.	.	.	.
Chr.4	75904186	75904190	Shank length QTL (193683)		+	75904186	75904190	.	.	.	.
Chr.4	75904186	75904190	Heart weight QTL (170518)		+	75904186	75904190	.	.	.	.
Chr.4	75904186	75904190	Gizzard weight QTL (170521)		+	75904186	75904190	.	.	.	.
Chr.4	75904186	75904190	Egg weight QTL (63873)		+	75904186	75904190	.	.	.	.
Chr.4	75904186	75904190	Egg weight QTL (63876)		+	75904186	75904190	.	.	.	.
Chr.4	75904186	75904190	Egg weight QTL (19514)		+	75904186	75904190	.	.	.	.
Chr.4	75904186	75904190	Egg weight QTL (63879)		+	75904186	75904190	.	.	.	.
Chr.4	75904186	75904190	Yolk weight QTL (24937)		+	75904186	75904190	.	.	.	.
Chr.4	75904186	75904190	Tibia length QTL (193681)		+	75904186	75904190	.	.	.	.
Chr.4	75904186	75904190	Tibia weight QTL (193684)		+	75904186	75904190	.	.	.	.
Chr.4	75904186	75904190	Oviduct length QTL (151034)		+	75904186	75904190	.	.	.	.
Chr.4	75904186	75904190	Body weight QTL (24949)		+	75904186	75904190	.	.	.	.
Chr.4	75904186	75904190	Egg weight QTL (63926)		+	75904186	75904190	.	.	.	.
Chr.4	75904186	75904190	Oviduct weight QTL (151107)		+	75904186	75904190	.	.	.	.
Chr.4	75904186	75904190	Proventriculus weight QTL (170519)		+	75904186	75904190	.	.	.	.
Chr.4	75904186	75904190	Albumen height QTL (24916)		+	75904186	75904190	.	.	.	.
Chr.4	75904186	75904190	Albumen height QTL (24919)		+	75904186	75904190	.	.	.	.
Chr.4	75904186	75904190	Egg weight QTL (63874)		+	75904186	75904190	.	.	.	.
Chr.4	75904186	75904190	Egg weight QTL (19512)		+	75904186	75904190	.	.	.	.
Chr.4	75904186	75904190	Egg weight QTL (63877)		+	75904186	75904190	.	.	.	.
Chr.4	75913100	75913104	Egg weight QTL (63883)		+	75913100	75913104	.	.	.	.
Chr.4	75913100	75913104	Egg weight QTL (63886)		+	75913100	75913104	.	.	.	.
Chr.4	75913100	75913104	Oviduct length QTL (151035)		+	75913100	75913104	.	.	.	.
Chr.4	75913100	75913104	Oviduct weight QTL (151108)		+	75913100	75913104	.	.	.	.
Chr.4	75913100	75913104	Liver weight QTL (170523)		+	75913100	75913104	.	.	.	.
Chr.4	75913100	75913104	Egg weight QTL (63881)		+	75913100	75913104	.	.	.	.
Chr.4	75913100	75913104	Egg weight QTL (63884)		+	75913100	75913104	.	.	.	.
Chr.4	75913100	75913104	Egg weight QTL (63887)		+	75913100	75913104	.	.	.	.
Chr.4	75913100	75913104	Egg weight QTL (63931)		+	75913100	75913104	.	.	.	.
Chr.4	75913100	75913104	Proventriculus weight QTL (170524)		+	75913100	75913104	.	.	.	.
Chr.4	75913100	75913104	Egg weight QTL (63882)		+	75913100	75913104	.	.	.	.
Chr.4	75913100	75913104	Egg weight QTL (63885)		+	75913100	75913104	.	.	.	.
Chr.4	75913100	75913104	Egg weight QTL (63888)		+	75913100	75913104	.	.	.	.
Chr.4	75913100	75913104	Heart weight QTL (170522)		+	75913100	75913104	.	.	.	.
Chr.4	75913100	75913104	Gizzard weight QTL (170525)		+	75913100	75913104	.	.	.	.
